# Supplementary material
Source: PubMed Central journal article supplement (PMC2899903)
Supplement: pp.110.154922_1.pdf [file pp.110.154922_1.pdf]

**A**

```

S1BCAT5 1 IDWDNLGFQLMOTDYMYVTK-CSDDGIIFRQGQLNRYGNIQLSPSAGVLNYGQGLFEGTKA
S1BCAT6 1 IDWDNLGFQLIOTDYMYMTK-CSDDGIIFRKGQLNRYGNIQLSPSAGVLNYGQGLFEGTKA
S1BCAT2 1 VDWDKLGFGFTPTDYMYITKSCDVAGNFKQGQLNGYDNIQLSPSAGVLNYGQGLFEGTKA
S1BCAT1 1 EDWDNLGFKLIOTDYMFMTK-SSQNGNFKEKGLNRYGNIQLSPSAGVLNYGQGLFEGTKA
S1BCAT4 1 IDWDNLGFVMPPTDYMYSMK-CSQDGNFSKGELOREGNIELSPASGILNYGQGLFEGTKA
S1BCAT3 1 IDWDNLGFGFMPPTDYMYSMK-CSQGENFSKGELOREGNIELSPSAGILNYGQGLFEGTKA

S1BCAT5 60 YRREDGRIFLFRPDIQNAIRMQIGAERMCMPCPSTDQFVEAVKQTALANKRWIPPFGKGSAL
S1BCAT6 60 YRRDDGRVFLFRPEQNAIRMQIGAERMCMPSPTDQFVDAVKQTALANKRWIPPSGKGSAL
S1BCAT2 61 YRQDNGGLSLFRPRENAIRMQIGAERMCMPIYPTDQFVDAVKQTALANKRWIPPPGKGSAL
S1BCAT1 60 YRVDDGRIFLFRPQESQIRMQIGAKRMCMPSPTDQFVDAVKLTTLANKRWIPPAKGSAL
S1BCAT4 60 YKRHDGNILLFRPEENALRMKMGAEKRMCMPSPTDQFVEAVKATVLANERWIPPPGKGSAL
S1BCAT3 60 YRKHHDGNILLFRPEENATRLKMGAEKRMCMPSPTDQFVEAVKATVLANERWIPPPGKGSAL

S1BCAT5 120 YIRPLLIGSGPIFGGLAPAPEYTFVLVYACPVGYFYKQGTAPLNLYVEEDVHRASRGGAGGV
S1BCAT6 120 YIRPLLIGTGPILGLAPAPEYTFVLVYACPVGNFYKQGTAPLNLYVEEDVHRASRGGAGGV
S1BCAT2 121 YIRPLLIGSGSILGLAPAPEYTFVLVYACPVGNFYKQGTAPLNLYVEEDVHRASRGGAGGV
S1BCAT1 120 YIRPLLIGNGPILGLAPAPEYTFVLVYACPVGNFYLRNGTQPLTLYVEEDVHRASRGGAGGV
S1BCAT4 120 YIRPLLMGSGAILGVAPAPEYTFVLVYVSPVGNFYKQGMAPINLLIETEMHRATPGGTGGV
S1BCAT3 120 YIRPLLMGSGAVLGLAPAPEYTFVLVYVSPVGNFYKQGLAPINLVVETEMHRATPGGTGGV

S1BCAT5 180 KSITNYAPVLKAMKNAKANGYSDVLYLDAVNKKYIEEVSSCNIFLVKGNVISTPIAKGTI
S1BCAT6 180 KSITNYAPVLKAMKNAKANGYSDVLYLDAVNKKYIEEVSSCNIFLVKGNVISTPIAKGTI
S1BCAT2 181 KSITNYAPVLRAIRNARERGYSDVLYLDSVNKKYIEEVSSCNIFLVKGVISTPIACGTI
S1BCAT1 180 KSITNYAPVTKATQEAKDRGYSDVLYLDSVNKKYIEEVSAANIFLVKGNVISTPIASGTI
S1BCAT4 180 KTIIGNYA AVLKAQSAAKAKGYSDVLYLDSVNRRYIEEVSSCNVFTVKGNLIATPAIKGTI
S1BCAT3 180 KTIIGNYA AVLKAQSAAKAKGYSDVLYLDCVQKKYIEEVSSCNVFTVKGNLIVTPAIKGTI

S1BCAT5 240 LEGITRKSIMDIAHDLGYTVEERLIEADELFTADEVFCTGTAVGVAVPGSITYKGQRIEY
S1BCAT6 240 LEGITRKSIMDIAHDLGYTVEERLIEADELISADEVFCTGTAVGVAVPGSITYKGQRIDY
S1BCAT2 241 LEGVTRKSIMEIATDLGYQVEERLIEADELISADEVFCTGTAVGVAVPGSITYKGQRIEY
S1BCAT1 240 LEGVTRKSIIDIAHDLGYKVEERLIEADELFSADEVFCTGTALGVAVPGSITYKNKRINY
S1BCAT4 240 FPGITRKSIIIDVALSQGFQVEERQVSVDELIDADEVFCTGTAVVVSVPVGSITHLGRVSY
S1BCAT3 240 LFPGITRKSIIIDVALSQGFVEERQVSVDELIDADEVFCTGTAVVVSVPVGSITHQGRVTY

S1BCAT5 300 KIS-SDLSCQEFYSRLVGIQRGVIKDERNWIWIEIE
S1BCAT6 300 KIS-SDLSCQXYSRLVGIQRGVIKDERDWIWIEIE
S1BCAT2 301 KIR-SELVCKKLYSTLVGIQKRHIEDKRDWIVDIE
S1BCAT1 300 KVS-SDLISEQLNSRLVAIQKGLIEDKRGWIIEIK
S1BCAT4 300 GSDGVGRVSKQLYSTLTSIQMGLATDNMNWTVELK
S1BCAT3 300 GNDGVGLVSSQQLYSALTSIQMGLSEDKMGWIVELK

```

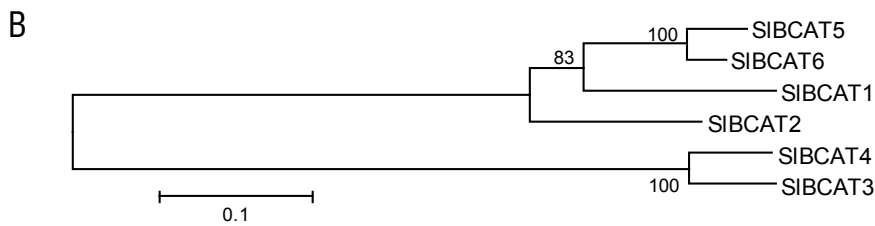

**Figure S1.** Evolutionary relationships of mature SIBCAT proteins. Mature peptides were predicted by omitting highly divergent N-terminal residues thought to be transit peptides.

A, Alignment of amino acid sequences using ClustalW (Larkin et al., 2007). B, The evolutionary history was inferred using the Neighbor-Joining method (Saitou and Nei, 1987). The optimal tree with the sum of branch length = 1.21366717 is shown. The percentage of replicate trees in which the proteins clustered together in the bootstrap test (500 replicates) are shown next to the branches (Felsenstein, 1985). The tree is drawn to scale, with branch lengths in the same units as those of the evolutionary distances used to infer the phylogenetic tree. There were a total of 332 amino acids in the final dataset. Phylogenetic analyses were conducted in MEGA4 (Tamura et al., 2007).

```

SIBCAT5 1  LDWDLGRFGLGIDYMYRGRSGEGRGRCGLLRVGNLSPSAGVLYNGQGLFEGKRA
SIBCAT6 1  LDWDLGRFGLGIDYMYRGRSGEGRGRCGLLRVGNLSPSAGVLYNGQGLFEGKRA
SIBCAT2 1  LDWDLGRFGLGIDYMYRGRSGEGRGRCGLLRVGNLSPSAGVLYNGQGLFEGKRA
SIBCAT1 1  LDWDLGRFGLGIDYMYRGRSGEGRGRCGLLRVGNLSPSAGVLYNGQGLFEGKRA
AtBCAT2 1  LDWDLGRFGLGIDYMYRGRSGEGRGRCGLLRVGNLSPSAGVLYNGQGLFEGKRA
AtBCAT3 1  LDWDLGRFGLGIDYMYRGRSGEGRGRCGLLRVGNLSPSAGVLYNGQGLFEGKRA
AtBCAT5 1  LDWDLGRFGLGIDYMYRGRSGEGRGRCGLLRVGNLSPSAGVLYNGQGLFEGKRA
SIBCAT4 1  LDWDLGRFGLGIDYMYRGRSGEGRGRCGLLRVGNLSPSAGVLYNGQGLFEGKRA
SIBCAT3 1  LDWDLGRFGLGIDYMYRGRSGEGRGRCGLLRVGNLSPSAGVLYNGQGLFEGKRA
AtBCAT1 1  LDWDLGRFGLGIDYMYRGRSGEGRGRCGLLRVGNLSPSAGVLYNGQGLFEGKRA
AtBCAT6 1  LDWDLGRFGLGIDYMYRGRSGEGRGRCGLLRVGNLSPSAGVLYNGQGLFEGKRA
AtBCAT7 1  LDWDLGRFGLGIDYMYRGRSGEGRGRCGLLRVGNLSPSAGVLYNGQGLFEGKRA
AtBCAT4 1  LDWDLGRFGLGIDYMYRGRSGEGRGRCGLLRVGNLSPSAGVLYNGQGLFEGKRA

SIBCAT5 60  YRFDGRLLFRFRENARRMGGAERMCMPEFVQFVAVKQTLANKRWIPEFGKRA
SIBCAT6 60  YRFDGRLLFRFRENARRMGGAERMCMPEFVQFVAVKQTLANKRWIPEFGKRS
SIBCAT2 61  YRFDGRLLFRFRENARRMGGAERMCMPEFVQFVAVKQTLANKRWIPEFGKRS
SIBCAT1 60  YRFDGRLLFRFRENARRMGGAERMCMPEFVQFVAVKQTLANKRWIPEFGKRS
AtBCAT2 60  YRFDGRLLFRFRENARRMGGAERMCMPEFVQFVAVKQTLANKRWIPEFGKRS
AtBCAT3 60  YRFDGRLLFRFRENARRMGGAERMCMPEFVQFVAVKQTLANKRWIPEFGKRS
AtBCAT5 60  YRFDGRLLFRFRENARRMGGAERMCMPEFVQFVAVKQTLANKRWIPEFGKRS
SIBCAT4 60  YRFDGRLLFRFRENARRMGGAERMCMPEFVQFVAVKQTLANKRWIPEFGKRS
SIBCAT3 60  YRFDGRLLFRFRENARRMGGAERMCMPEFVQFVAVKQTLANKRWIPEFGKRS
AtBCAT1 60  YRFDGRLLFRFRENARRMGGAERMCMPEFVQFVAVKQTLANKRWIPEFGKRS
AtBCAT6 60  YRFDGRLLFRFRENARRMGGAERMCMPEFVQFVAVKQTLANKRWIPEFGKRS
AtBCAT7 60  YRFDGRLLFRFRENARRMGGAERMCMPEFVQFVAVKQTLANKRWIPEFGKRS
AtBCAT4 60  YRFDGRLLFRFRENARRMGGAERMCMPEFVQFVAVKQTLANKRWIPEFGKRS

SIBCAT5 119  LYIRPLLGGSGILGLAPAPEYTFLLYASVGNVFKGGLAPLNLYVEEHRRAHSGGAGG
SIBCAT6 119  LYIRPLLGGSGILGLAPAPEYTFLLYASVGNVFKGGLAPLNLYVEEHRRAHSGGAGG
SIBCAT2 120  LYIRPLLGGSGILGLAPAPEYTFLLYASVGNVFKGGLAPLNLYVEEHRRAHSGGAGG
SIBCAT1 119  LYIRPLLGGSGILGLAPAPEYTFLLYASVGNVFKGGLAPLNLYVEEHRRAHSGGAGG
AtBCAT2 119  LYIRPLLGGSGILGLAPAPEYTFLLYASVGNVFKGGLAPLNLYVEEHRRAHSGGAGG
AtBCAT3 120  LYIRPLLGGSGILGLAPAPEYTFLLYASVGNVFKGGLAPLNLYVEEHRRAHSGGAGG
AtBCAT5 119  LYIRPLLGGSGILGLAPAPEYTFLLYASVGNVFKGGLAPLNLYVEEHRRAHSGGAGG
SIBCAT4 119  LYIRPLLGGSGILGLAPAPEYTFLLYASVGNVFKGGLAPLNLYVEEHRRAHSGGAGG
SIBCAT3 119  LYIRPLLGGSGILGLAPAPEYTFLLYASVGNVFKGGLAPLNLYVEEHRRAHSGGAGG
AtBCAT1 119  LYIRPLLGGSGILGLAPAPEYTFLLYASVGNVFKGGLAPLNLYVEEHRRAHSGGAGG
AtBCAT6 119  LYIRPLLGGSGILGLAPAPEYTFLLYASVGNVFKGGLAPLNLYVEEHRRAHSGGAGG
AtBCAT7 119  LYIRPLLGGSGILGLAPAPEYTFLLYASVGNVFKGGLAPLNLYVEEHRRAHSGGAGG
AtBCAT4 119  LYIRPLLGGSGILGLAPAPEYTFLLYASVGNVFKGGLAPLNLYVEEHRRAHSGGAGG

SIBCAT5 179  VKSITNYAPVLRKRNARANGYSDVLYLCAHKKYIEEVSSCNIFVRGNLSTPFAIKGT
SIBCAT6 179  VKSITNYAPVLRKRNARANGYSDVLYLCAHKKYIEEVSSCNIFVRGNLSTPFAIKGT
SIBCAT2 180  VKSITNYAPVLRKRNARANGYSDVLYLCAHKKYIEEVSSCNIFVRGNLSTPFAIKGT
SIBCAT1 179  VKSITNYAPVLRKRNARANGYSDVLYLCAHKKYIEEVSSCNIFVRGNLSTPFAIKGT
AtBCAT2 179  VKSITNYAPVLRKRNARANGYSDVLYLCAHKKYIEEVSSCNIFVRGNLSTPFAIKGT
AtBCAT3 180  VKSITNYAPVLRKRNARANGYSDVLYLCAHKKYIEEVSSCNIFVRGNLSTPFAIKGT
AtBCAT5 179  VKSITNYAPVLRKRNARANGYSDVLYLCAHKKYIEEVSSCNIFVRGNLSTPFAIKGT
SIBCAT4 179  VKSITNYAPVLRKRNARANGYSDVLYLCAHKKYIEEVSSCNIFVRGNLSTPFAIKGT
SIBCAT3 179  VKSITNYAPVLRKRNARANGYSDVLYLCAHKKYIEEVSSCNIFVRGNLSTPFAIKGT
AtBCAT1 179  VKSITNYAPVLRKRNARANGYSDVLYLCAHKKYIEEVSSCNIFVRGNLSTPFAIKGT
AtBCAT6 178  VKSITNYAPVLRKRNARANGYSDVLYLCAHKKYIEEVSSCNIFVRGNLSTPFAIKGT
AtBCAT7 178  VKSITNYAPVLRKRNARANGYSDVLYLCAHKKYIEEVSSCNIFVRGNLSTPFAIKGT
AtBCAT4 178  VKSITNYAPVLRKRNARANGYSDVLYLCAHKKYIEEVSSCNIFVRGNLSTPFAIKGT

SIBCAT5 239  LLPGTRKSIHLDLGGVVEERILPADELPADEVFCTGTAVVAVPGSITVRRKRS
SIBCAT6 239  LLPGTRKSIHLDLGGVVEERILPADELPADEVFCTGTAVVAVPGSITVRRKRS
SIBCAT2 240  LLPGTRKSIHLDLGGVVEERILPADELPADEVFCTGTAVVAVPGSITVRRKRS
SIBCAT1 239  LLPGTRKSIHLDLGGVVEERILPADELPADEVFCTGTAVVAVPGSITVRRKRS
AtBCAT2 239  LLPGTRKSIHLDLGGVVEERILPADELPADEVFCTGTAVVAVPGSITVRRKRS
AtBCAT3 240  LLPGTRKSIHLDLGGVVEERILPADELPADEVFCTGTAVVAVPGSITVRRKRS
AtBCAT5 239  LLPGTRKSIHLDLGGVVEERILPADELPADEVFCTGTAVVAVPGSITVRRKRS
SIBCAT4 239  LLPGTRKSIHLDLGGVVEERILPADELPADEVFCTGTAVVAVPGSITVRRKRS
SIBCAT3 239  LLPGTRKSIHLDLGGVVEERILPADELPADEVFCTGTAVVAVPGSITVRRKRS
AtBCAT1 239  LLPGTRKSIHLDLGGVVEERILPADELPADEVFCTGTAVVAVPGSITVRRKRS
AtBCAT6 238  LLPGTRKSIHLDLGGVVEERILPADELPADEVFCTGTAVVAVPGSITVRRKRS
AtBCAT7 238  LLPGTRKSIHLDLGGVVEERILPADELPADEVFCTGTAVVAVPGSITVRRKRS
AtBCAT4 238  LLPGTRKSIHLDLGGVVEERILPADELPADEVFCTGTAVVAVPGSITVRRKRS

SIBCAT5 299  VVSSDLSCKVSTLWIKRSHEDKGGVVEE
SIBCAT6 299  VVSSDLSCKVSTLWIKRSHEDKGGVVEE
SIBCAT2 300  VVSSDLSCKVSTLWIKRSHEDKGGVVEE
SIBCAT1 299  VVSSDLSCKVSTLWIKRSHEDKGGVVEE
AtBCAT2 299  VVSGDLSCKVSTLWIKRSHEDKGGVVEE
AtBCAT3 300  VEGTFGVSKDLVLSKGGVVEE
AtBCAT5 299  VEGTFGVSKDLVLSKGGVVEE
SIBCAT4 299  VEGTFGVSKDLVLSKGGVVEE
SIBCAT3 299  VEGTFGVSKDLVLSKGGVVEE
AtBCAT1 299  VEGTFGVSKDLVLSKGGVVEE
AtBCAT6 298  VEGTFGVSKDLVLSKGGVVEE
AtBCAT7 298  VEGTFGVSKDLVLSKGGVVEE
AtBCAT4 298  VEGTFGVSKDLVLSKGGVVEE

```

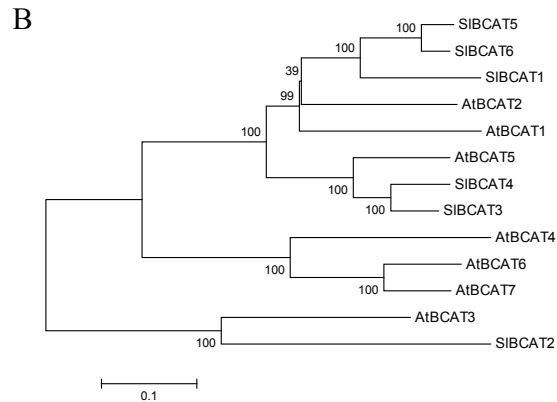

**Figure S2.** Evolutionary relationships of mature SIBCAT and AtBCAT proteins. Mature peptides were predicted by omitting highly divergent N-terminal residues thought to be transit peptides. A, Alignment of amino acid sequences using ClustalW (Larkin et al., 2007). B, The evolutionary history was inferred using the Neighbor-Joining method (Saitou and Nei, 1987). The optimal tree with the sum of branch length = 2.55921922 is shown. The percentage of replicate trees in which the associated taxa clustered together in the bootstrap test (500 replicates) are shown next to the branches (Felsenstein, 1985). The tree is drawn to scale, with branch lengths in the same units as those of the evolutionary distances used to infer the phylogenetic tree. There were a total of 331 positions in the final dataset. Phylogenetic analyses were conducted in MEGA4 (Tamura et al., 2007).

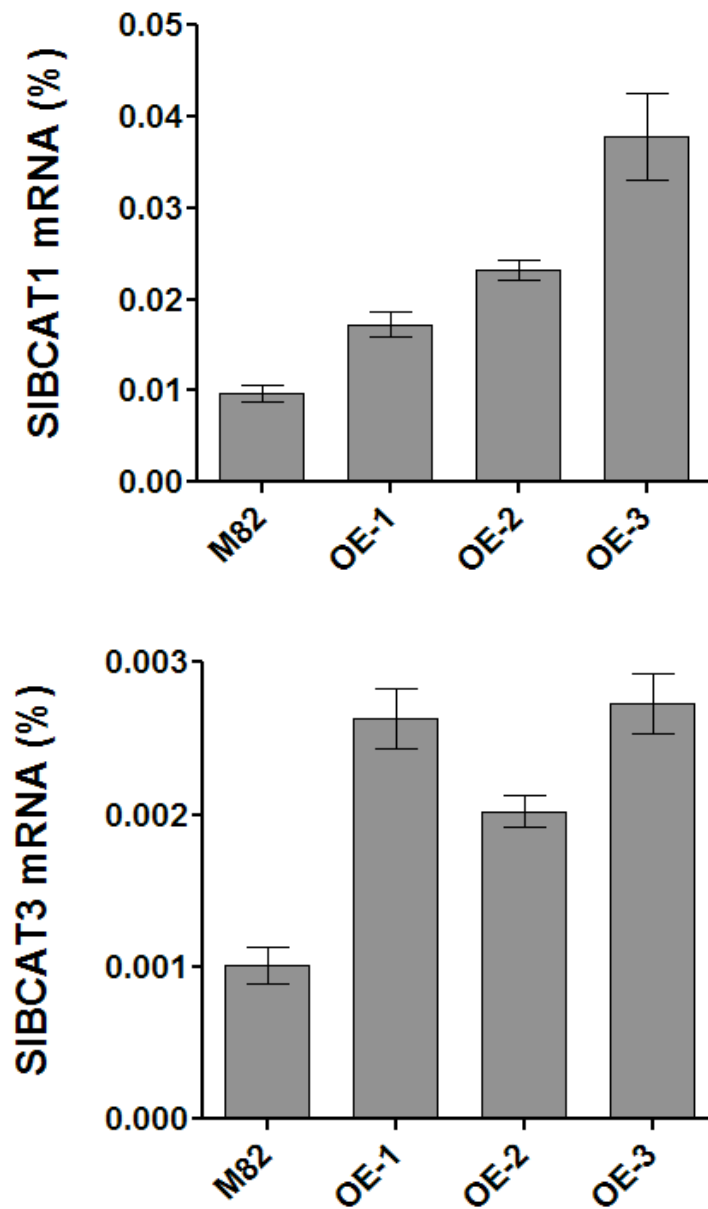

**Figure S3.** Transcript analysis in fruits of transgenic plants overexpressing *SIBCATs*. Analysis was performed on three biological and three technical replicates of ripe fruit for each sample. Values represent percentage of total mRNA per sample  $\pm$  SD, calculated from a standard curve for each cDNA. Data were analyzed by one-way ANOVA and values of each line are significantly different compared to control as determined by Tukey's test ( $p < 0.05$ ).

```

M82 1 ATGATCATCAAAGGGCTTCATCCTTTCAAAGGGCTCTATTTACTTCTTTTGAGAAGAAG
Lp 1 ATGATCATCAAAGGGCTTCATCCTTTCAAAGGGCTCTATTTACTTCTTTTGAGAAGAAG

M82 61 GTAGGACCAAGGTACTTTACTGCCCTGCTCTAACTTCTGCACAACCTTCACTTATAGG
Lp 61 GTAGGACCAAGGTACTTTACTGCCCTGCTCTAACTTCTGCACAACCTTCACTTATAGG

M82 121 GATTATGAATCAAGGGATATTTTTGATTGGGATAATCTTGGATTAAATTAATTCAAAC
Lp 121 GATTATGAATCAAGGGATATTTTTGATTGGGATAATCTTGGATTAAATTAATTCAAAC

M82 181 GATTATATGTTTATGACAAAAAGTTCTCAAATGGGAATTTTGAAAAAGGCAAACCTAAT
Lp 181 GATTATATGTTTATGACAAAAAGTTCTCAAATGGGAATTTTGAAAAAGGCAAACCTAAT

M82 241 CCTTATGGGAATATTGAATTAAGTCCCTCTGCTGGTCTATTGAACTATGGACAGGGTTA
Lp 241 CCTTATGGGAATATTGAATTAAGTCCCTCTGCTGGTCTATTGAACTATGGACAGGGTTA

M82 301 ATTGAAGGTACAAAAGCTTATAGAGTGGATGATGGAAGAATATTTCTATTTTCGTCCACAA
Lp 301 ATTGAAGGTACAAAAGCTTATAGAGTGGATGATGGAAGAATATTTCTATTTTCGTCCACAA

M82 361 GAAAGTGGGAATTAGAATGCAAATGGTGC TAAAAGAATGTGTATGCCTTCTCCTTCTATT
Lp 361 GAAAGTGGGAATTAGAATGCAAATGGTGC TAAAAGAATGTGTATGCCTTCTCCTTCTATT

M82 421 CAACAATTTGTTGATGCTGTCAAGTTAACAACCTATAGCTAATAAACGTTGGATCCCTCCT
Lp 421 CAACAATTTGTTGATGCTGTCAAGTTAACAACCTATAGCTAATAAACGTTGGATCCCTCCT

M82 481 GCTGGAAAAGGGTCACTTTATATTAGGCCTTTGCTTATTGGAAATGGACCTATACTTGA
Lp 481 GCTGGAAAAGGGTCACTTTATATTAGGCCTTTGCTTATTGGAAATGGACCTATACTTGA

M82 541 ATTGCTCCAGCACCAGAGTATACATTTATGTCTATGCTTGTCTCTGTTGGAAATTATTTA
Lp 541 ATTGCTCCAGCACCAGAGTATACATTTATGTCTATGCTTGTCTCTGTTGGAAATTATTTA

M82 601 AGGAATGGGACACAACTTTAACTTTATATGTTGAAGAAGAACATCATCGTGCATCACAA
Lp 601 AGGAATGGGACACAACTTTAACTTTATATGTTGAAGAAGAACATCATCGTGCATCACAA

M82 661 GGGGGAGCTGGTGGAGTCAAATCCATTACTAATTATGCTCCGGTGATAAAAAGCTATACAG
Lp 661 GGGGGAGCTGGTGGAGTCAAATCCATTACTAATTATGCTCCGGTGATAAAAAGCTATACAG

M82 721 GAAGCAAAAAGATAGAGGATACTCAGATGTATTATATCTTGATTAGTAAATAAAAAATAT
Lp 721 GAAGCAAAAAGAGAAAGGATACTCAGATGTATTATATCTTGATTAGTAAATAAAAAATAT

M82 781 ATTGAAGAGGTCTCTGCTGCTAACATAATTCCCTTGTAAGGGGAAAAAACATTTCAACACCA
Lp 781 ATTGAAGAGGTATCTGCTGCTAACATAATTCCCTTGTAAGGGGAAAAAACATTTCAACACCA

M82 841 ATTGCTAGTGAACCATTCCTTGAAGGTGTACAAGGAAAAGTATTATAGACATTCGCACAT
Lp 841 ATTGCTAGTGAACCATTCCTTGAAGGTGTACAAGGAAAAGTATTATAGACATTCGCACAT

M82 901 GATCTTGGATACAAGGTTGAAGAACGTTTGATTGAAGCAGATGAATTGTTTAGTGCTGAT
Lp 901 GATCTTGGATACAAGGTTGAGAACGTTTGATTGAAGCAGATGAATTGTTTAGTGCTGAT

M82 961 GAAGTATTTTGTACTGGAAGTGCCTTGGTGTGCTCCTGTAGGAGTATTACCTACAAA
Lp 961 GAAGTATTTTGTACTGGAAGTGCCTTGGTGTGCTCCTGTAGGAGTATTACCTACAAA

M82 1021 AACAAAAGGATTAAC TACAAGGTAAGCTCAGACTTAATAAGTGAGCAATTGAACTCAAGA
Lp 1021 AACAAAAGGATTAAC TACAAGGTAAGCTCAGACTTAATAAGTGAGCAATTGAACTCAAGA

M82 1081 TTAGTAGCAATTCAAAAAGGTATTATTGAGGACAAGAGGGGTTGGATTATTGAGATTAAG
Lp 1081 TTAGTAGCAATTCAAAAAGGTATTATTGAGGACAAGAGGGGTTGGATTATTGAGATTAAG

M82 1141 TGA
Lp 1141 TGA

```

**Figure S4.** Comparison of nucleotide sequences of BCAT1 from *S. lycopersicum* cv. M82 and *S. pennellii* (Lp). Alignment of the sequences was carried out using the ClustalW and output processed using the Boxshade program. White boxes indicate nucleotide changes between variants. The black boxes indicate identical base pairs, gray indicates conservative substitutions.

**Table S1.** Levels of free amino acids in red ripe fruit of M82 and *SIBCAT* over-expression lines.

| Line         | Amino acid quantity<br>(ng gFW <sup>-1</sup> ) |             |             |             |             |             |             |
|--------------|------------------------------------------------|-------------|-------------|-------------|-------------|-------------|-------------|
|              | Val                                            | Leu         | Ile         | Ala         | Pro         | Met         | Lys         |
| M82          | 0.79 ± 0.06                                    | 1.12 ± 0.14 | 2.19 ± 0.26 | 6.69 ± 0.48 | 1.91 ± 0.28 | 0.65 ± 0.10 | 3.01 ± 0.22 |
| SIBCAT1-OE-1 | 0.61 ± 0.06                                    | 0.95 ± 0.09 | 2.22 ± 0.18 | 3.25 ± 0.29 | 3.73 ± 0.35 | 0.60 ± 0.05 | 2.58 ± 0.19 |
| SIBCAT1-OE-2 | 0.70 ± 0.10                                    | 1.06 ± 0.09 | 2.21 ± 0.18 | 6.92 ± 1.27 | 3.45 ± 0.54 | 0.47 ± 0.05 | 2.04 ± 0.21 |
| SIBCAT1-OE-3 | 0.72 ± 0.17                                    | 1.13 ± 0.15 | 2.64 ± 0.40 | 6.20 ± 1.65 | 3.32 ± 0.41 | 0.62 ± 0.04 | 2.62 ± 0.45 |
| SIBCAT3-OE-1 | 0.73 ± 0.12                                    | 1.19 ± 0.20 | 3.38 ± 0.60 | 3.44 ± 0.50 | 2.88 ± 0.06 | 0.74 ± 0.16 | 1.87 ± 0.26 |
| SIBCAT3-OE-2 | 0.64 ± 0.07                                    | 1.08 ± 0.12 | 3.52 ± 0.42 | 5.02 ± 0.68 | 2.61 ± 0.29 | 0.62 ± 0.06 | 2.37 ± 0.26 |
| SIBCAT3-OE-3 | 1.47 ± 0.32                                    | 2.61 ± 0.45 | 7.96 ± 1.81 | 7.92 ± 1.00 | 5.57 ± 1.05 | 1.00 ± 0.03 | 4.83 ± 0.72 |

Values are expressed as means ± SD.

**Table S2.** Primer sequences used in present study.

| <b>Primer name</b>               | <b>Primer sequence (5'→ 3')</b>        |
|----------------------------------|----------------------------------------|
| <i>ilvE</i> -FlankF              | GATGCAACATCAGGTCAATGT                  |
| <i>ilvE</i> -FlankR              | CGCAATGGTGTGAACTCTT                    |
| <i>tyrB</i> -FlankF              | CTTATTACGCGCCTGACTTC                   |
| <i>tyrB</i> -FlankR              | CACAGGCAATAAGGCAAAGC                   |
| <i>SIBCAT3</i> -pET28bF          | GCTAGCGAGAGCGCCGCCGTATTT               |
| <i>SIBCAT3</i> -pET28bR          | GTCGACTTTGAGCTCAACAATCCAACCC           |
| <i>SIBCAT1</i> -pET28bF          | GCTAGCTCTGCACAACCTTCAACTTATAG          |
| <i>SIBCAT1</i> -pET28bR          | GTCGACCTTAATCTCAATAATCCAACCCCT         |
| <i>SIBCAT4</i> -pET28bF          | GCTAGCTTTCAGAAGCAGTCACATTTTGC          |
| <i>SIBCAT4</i> -pET28bR          | GTCGACTCATTTTGTAGCTCAACAGTCCAATT       |
| <i>SIBCAT2</i> -pET28bF          | GCTAGCTACTACACAGCTCAGGTTG              |
| <i>SIBCAT2</i> -pET28bR          | GTCGACTCATTCAATGTCAACAATCCAATC         |
| <i>SIBCAT5</i> -pET28bF          | GCTAGCGCTTCTTCTCAATCTGTTCTCT           |
| <i>SIBCAT5</i> -pET28bR          | GTCGACTTCGATCTCCACGATCCAATT            |
| <i>SIBCAT6</i> -pET28bF          | GCTAGCTGTTATACAGCTCAGGCGG              |
| <i>SIBCAT6</i> -pET28bR          | GTCGACTCATTCAATCTCCACGATCCAAT          |
| <i>SIBCAT3</i> -pDONRF           | AAAAAGCAGGCTCCATGGAGAGCGCCGCCGTATTT    |
| <i>SIBCAT3</i> -pDONRR           | AGAAAGCTGGGTCTTTGAGCTCAACAATCCAACC     |
| <i>SIBCAT1</i> -pDONRF           | AAAAAGCAGGCTCCATGATCATCCAAAGGGCTTCA    |
| <i>SIBCAT1</i> -pDONRR           | AGAAAGCTGGGTCTTAAATCTCAATAATCCAACCC    |
| <i>SIBCAT4</i> -pDONRF           | AAAAAGCAGGCTCCATGGAGAGCGGCGGCG         |
| <i>SIBCAT4</i> -pDONRR           | AGAAAGCTGGGTCTTTTGTAGCTCAACAGTCCAATTCA |
| <i>SIBCAT2</i> -pDONRF           | AAAAAGCAGGCTCCATGATTCAAAGGGCCGCACCT    |
| <i>SIBCAT2</i> -pDONRR           | AGAAAGCTGGGTCTTCAATGTCAACAATCCAATC     |
| <i>SIBCAT5</i> -pDONRF           | AAAAAGCAGGCTCCATGGCTTCTTCTCAATCTGTT    |
| <i>SIBCAT5</i> -pDONRR           | AGAAAGCTGGGTCTTCGATCTCCACGATCC         |
| <i>SIBCAT6</i> -pDONRF           | AAAAAGCAGGCTCCATGATTGAGGAGCCGCATG      |
| <i>SIBCAT6</i> -pDONRR           | AGAAAGCTGGGTCTGTAAGTGACCCTTTTCCAGAAG   |
| Attb1-pDONR                      | GGGGACAAGTTTGTACAAAAAAGCAGGCT          |
| Attb2-pDONR                      | GGGGACCACTTTGTACAAGAAAGCTGGGT          |
| <i>SIBCAT1</i> -pENTR/SD/D-TOPOF | ATGATCATCCAAAGGGCTTCA                  |
| <i>SIBCAT1</i> -pENTR/SD/D-TOPOR | AATCTCAATAATCCAACCCCTCTT               |
| <i>SIBCAT3</i> -qRT-PCRF         | GTCACCATAACCACCTTCTGG                  |
| <i>SIBCAT3</i> -qRT-PCRR         | GGACTCAACTCAATGTTACCG                  |
| <i>SIBCAT1</i> -qRT-PCRF         | AGGGCTCTATTTACTTCTTTTGTAG              |
| <i>SIBCAT1</i> -qRT-PCRR         | CATACACATTCTTTTGTAGACCAATT             |
| <i>SIBCAT4</i> -qRT-PCRF         | TACTTGCCACCACCTTCCC                    |
| <i>SIBCAT4</i> -qRT-PCRR         | TCCATAATTCAATATCCCAGAAGC               |
| <i>SIBCAT2</i> -qRT-PCRF         | AATTGTTTGAATTTTCATCTCTGCG              |
| <i>SIBCAT2</i> -qRT-PCRR         | ATACACATTCTTTTCAGCTCCAATC              |
| <i>SIBCAT5</i> -qRT-PCRF         | CTCACCTTCTCTACACCAC                    |
| <i>SIBCAT5</i> -qRT-PCRR         | AATAGCCGTTTGTCTAACAGCC                 |
| <i>SIBCAT6</i> -qRT-PCRF         | GGTGTATACAGCTCAGGCG                    |
| <i>SIBCAT6</i> -qRT-PCRR         | CAGGACGAAATAAAAAATACTCTCC              |
| <i>UBI3F</i>                     | GGTTAAGCTCGCTGTGTTGCA                  |
| <i>UBI3R</i>                     | CGAAGCCTCTGAACCTTTCCA                  |

### **Literature Cited in Supplementary Materials**

**Felsenstein J** (1985) Confidence-limits on phylogenies - an approach using the bootstrap. *Evolution* **39**: 783-791

**Saitou N, Nei M** (1987) The neighbor-joining method: A new method for reconstructing phylogenetic trees. *Mol Biol Evol* **4**: 406-425

**Tamura K, Dudley J, Nei M, Kumar S** (2007) MEGA4: molecular evolutionary genetics analysis (MEGA) software version 4.0. *Molecular Biology and Evolution* **24**: 1596-1599
